# Supplementary material
Source: publisher figshare collection journal article supplement (https://acs.figshare.com/ndownloader/files/5734434)
Supplement: Supplementary file 1 [file 5734434]

## *Supplementary Material*

### **Group 6 Heteroatom- and Nonheteroatom-Stabilized Carbene Complexes. $\beta,\beta'$ - and $\alpha,\beta,\beta'$ -Annulation Reactions of Cyclic Enamines**

José Barluenga,\* Alfredo Ballesteros, Ramón Bernardo de la Rúa, Javier Santamaría, Eduardo Rubio and Miguel Tomás

*Instituto Universitario de Química Organometálica "Enrique Moles", Unidad Asociada al  
CSIC,  
Universidad de Oviedo, Julian Clavería 8, 33071-Oviedo, Spain*

#### *Contents*

Characterization data of compounds **5b,f**, **6b,d**, **7b,d**, **8b**, **12b,c**, **7-d-b**, **13b**, **15b,c**, (+)-**22**, (-)-**23**, (+)-**24**.

**Compound 5b:** from pentacarbonyl[(*E*)-2-phenylethenyl(methoxy)carbene]tungsten **2b**.

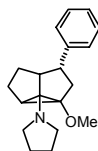

Yield: 88%;  $^1\text{H}$  NMR ( $\text{CDCl}_3$ , 200 MHz):  $\delta$  1.25 (m, 1H), 1.4-1.6 (m, 2H), 1.7 (d, 1H,  $J = 6.6$  Hz), 1.9 (m, 4H), 2.05 (m, 1H), 2.2 (dd, 1H,  $J = 10.8, 13.1$  Hz), 2.45 (dd, 1H,  $J = 9.7, 13.1$  Hz), 2.85 (m, 4H), 3.0 (t, 1H,  $J = 6.5$  Hz), 3.4 (s, 3H), 3.5 (m, 1H), 7.1-7.35 (m, 5H);  $^{13}\text{C}$  NMR ( $\text{CDCl}_3$ , 75 MHz):  $\delta$  23.9 (2 x  $\text{CH}_2$ ), 25.3 ( $\text{CH}_2$ ), 30.7 ( $\text{CH}_2$ ), 31.6 ( $\text{CH}_2$ ), 36.5 (CH), 46.3 (CH), 48.8 (CH), 51.2 (2 x  $\text{CH}_2$ ), 56.4 ( $\text{CH}_3$ ), 68.2 (C), 75.6 (C), 125.7 (CH), 127.7 (2 x CH), 127.9 (2 x CH), 141.3 (C); HRMS: Calcd for  $\text{C}_{19}\text{H}_{25}\text{NO}$ : 283.1936; Found: 283.1936. Anal. Calcd for  $\text{C}_{19}\text{H}_{25}\text{NO}$ : C, 80.52; H, 8.89; N, 4.94; Found: C, 80.63; H, 9.00; N, 4.91

**Compound 5f:** from pentacarbonyl[(*E*)-2-phenylethenyl[(1*R*,2*S*,5*R*)-menthyloxy]carbene] chromium **2f**.

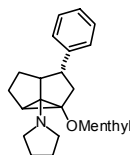

Yield: 73%.  $[\alpha]_{\text{D}}^{20} = -7.51$  ( $c$  0.94  $\text{CH}_2\text{Cl}_2$ );  $^1\text{H}$  NMR ( $\text{CDCl}_3$ , 300 MHz):  $\delta$  0.8 (d, 3H,  $J = 6.9$  Hz), 0.9 (d, 3H,  $J = 7.2$  Hz), 0.95 (d, 3H,  $J = 6.7$  Hz), 0.7-1.1 (m, 3H), 1.2-1.7 (m, 8H), 1.85 (m, 4H), 2.0-2.5 (m, 5H), 2.9 (m, 4H), 3.05 (t, 1H,  $J = 6.7$  Hz), 3.5 (m, 2H), 7.1-7.3 (m, 5H);  $^{13}\text{C}$  NMR ( $\text{CDCl}_3$ , 75 MHz):  $\delta$  16.0 ( $\text{CH}_3$ ), 20.8 ( $\text{CH}_3$ ), 22.5 ( $\text{CH}_3$ ), 23.2 ( $\text{CH}_2$ ), 23.9 (2 x  $\text{CH}_2$ ), 25.2 ( $\text{CH}_2$ ), 25.3 (CH), 31.3 ( $\text{CH}_2$ ), 31.4 ( $\text{CH}_2$ ), 31.5 (CH), 34.4 ( $\text{CH}_2$ ), 39.4 (CH), 40.6 ( $\text{CH}_2$ ), 47.2 (CH), 47.5 (CH), 49.1 (CH), 51.0 (2 x  $\text{CH}_2$ ), 65.2 (C), 71.0 (C), 76.6 (CH), 125.7 (CH), 127.8 (2 x CH), 128.0 (2 x CH), 141.6 (C); HRMS Calcd. for  $\text{C}_{28}\text{H}_{41}\text{NO}$ : 407.3188; Found: 407.3199; Anal. Calcd for  $\text{C}_{28}\text{H}_{41}\text{NO}$ : C, 82.50; H, 10.14; N, 3.44; Found: C, 82.73; H, 10.21; N, 3.40

**Compound 6b:** from pentacarbonyl[(*E*)-2-phenylethenyl(methoxy)carbene]tungsten **2b**.

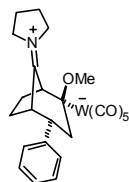

Yield: 94%; yellow solid; Mp: 97-99 °C dec.;  $^1\text{H}$  NMR (THF- $d_8$ , 300 MHz):  $\delta$  1.7 (m, 1H), 2.0-2.5 (m, 7H), 2.6 (m, 1H), 2.65 (dd, 1H,  $J = 4.1, 15.4$  Hz), 3.1 (d, 1H,  $J = 6.9$  Hz), 3.3 (s, 3H), 3.7 (m, 1H), 3.9 (d, 1H,  $J = 6.1$  Hz), 4.0-4.2 (m, 3H), 4.3-4.45 (m, 1H), 7.25 (m, 1H), 7.4 (m, 4H);  $^{13}\text{C}$  NMR (THF- $d_8$ , 75 MHz):  $\delta$  21.7 ( $\text{CH}_2$ ), 26.5 (2 x  $\text{CH}_2$ ), 28.4 ( $\text{CH}_2$ ), 41.5 ( $\text{CH}_2$ ), 50.1 (CH), 54.6 ( $\text{CH}_3$ ), 55.9 (CH), 56.0 ( $\text{CH}_2$ ), 56.3 ( $\text{CH}_2$ ), 65.0 (CH), 108.5 (C), 128.6 (CH), 129.6 (2 x CH), 130.5 (2 x CH), 143.8 (C), 201.4 (C), 206.0 (CO), 206.3 (4 x CO); FAB-MS ( $m/z$ ): 608 ( $\text{M}^+ + 1$ ); Anal. Calcd. for  $\text{C}_{24}\text{H}_{25}\text{NO}_6\text{W}$ : C, 47.46; H, 4.15; N, 2.30; Found: C, 47.18; H, 4.01; N, 2.26

**Compound 6d:** from pentacarbonyl[(*E*)-2-propylethenyl(methoxy)carbene]tungsten **2d**.

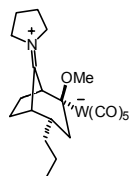

$^1\text{H}$  NMR (THF- $d_8$ , 300 MHz):  $\delta$  1.0 (m, 3H); 1.4 (m, 4H), 1.75 (m, 1H), 2.0-2.5 (m, 9H), 2.85 (brd, 1H,  $J = 7.0$  Hz), 3.25 (s, 3H), 3.35 (brs, 1H), 3.7-4.7 (m, 5H);  $^{13}\text{C}$  NMR (THF- $d_8$ , 75 MHz):  $\delta$  15.7 ( $\text{CH}_3$ ), 21.2 ( $\text{CH}_2$ ), 22.6 ( $\text{CH}_2$ ), 27.1 (2 x  $\text{CH}_2$ ), 28.3 ( $\text{CH}_2$ ), 37.2 ( $\text{CH}_2$ ), 43.8 ( $\text{CH}_2$ ), 47.7 (CH), 52.6 ( $\text{CH}_3$ ), 54.2 (CH), 54.4 ( $\text{CH}_2$ ), 55.7 ( $\text{CH}_2$ ), 54.9 (CH), 110.0 (C), 203.0 (C), 206.1 (CO), 206.4 (4 x CO)

**Compound (±)-7b:**

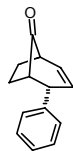

Yield: 89%; colorless oil;  $^1\text{H}$  NMR ( $\text{CDCl}_3$ , 300 MHz):  $\delta$  1.6-1.8 (m, 2H), 1.9-2.1 (m, 2H), 2.5 (m, 1H), 2.6 (m, 1H), 4.4 (m, 1H), 5.7 (ddd, 1H,  $J = 1.3, 2.4, 9.2$  Hz), 6.1 (ddd, 1H,  $J = 2.4, 7.0, 9.2$  Hz), 7.2-7.4 (m, 5H);  $^{13}\text{C}$  NMR ( $\text{CDCl}_3$ , 75 MHz):  $\delta$  19.0 ( $\text{CH}_2$ ), 28.6 ( $\text{CH}_2$ ), 44.5 (CH), 49.8 (CH), 55.0 (CH), 126.8 (CH), 127.8 (CH), 128.1 (2 x CH), 128.4 (2 x CH), 133.9 (CH), 140.5 (C), 215.8 (C); HRMS Calcd. for  $\text{C}_{14}\text{H}_{14}\text{O}$ : 198.1045; Found: 198.1031; Anal. Calcd for  $\text{C}_{14}\text{H}_{14}\text{O}$ : C, 84.81; H, 7.12; Found: C, 84.70; H, 7.04

**Compound (±)-7d:**

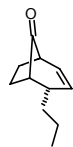

Major isomer; colorless oil;  $^1\text{H}$  NMR ( $\text{CDCl}_3$ , 300 MHz):  $\delta$  0.9 (t, 3H,  $J = 7.1$  Hz), 1.2-1.6 (m, 5H), 1.8-2.1 (m, 3H), 2.25 (m, 1H), 2.45 (m, 1H), 2.95 (m, 1H), 5.4 (ddd, 1H,  $J = 1.5, 2.0, 9.1$ ), 5.8 (ddd, 1H,  $J = 2.6, 6.6, 9.1$  Hz);  $^{13}\text{C}$  NMR ( $\text{CDCl}_3$ , 75 MHz):  $\delta$  13.9 ( $\text{CH}_3$ ), 18.3 ( $\text{CH}_2$ ), 19.9 ( $\text{CH}_2$ ), 28.8 ( $\text{CH}_2$ ), 33.8 ( $\text{CH}_2$ ), 45.2 (CH), 46.7 (CH), 50.0 (CH), 130.2 (CH), 130.7 (CH), 220.7 (C); HRMS Calcd. for  $\text{C}_{11}\text{H}_{16}\text{O}$ : 164.1201; Found: 164.1202; Anal. Calcd for  $\text{C}_{11}\text{H}_{16}\text{O}$ : C, 80.44; H, 9.82; Found: C, 80.23; H, 9.73

**Compound (±)-endo-8b:**

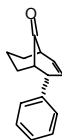

Yield 71%; white solid; Mp: 31-33 °C;  $^1\text{H}$  NMR ( $\text{CDCl}_3$ , 300 MHz):  $\delta$  1.35 (m, 1H), 1.5 (m, 2H), 1.8-2.0 (m, 3H), 2.7 (m, 1H), 3.0 (m, 1H), 4.15 (m, 1H), 5.8 (ddd, 1H,  $J = 2.9, 6.0, 9.9$ ), 6.2 (dd, 1H,  $J = 2.3, 9.7$  Hz), 7.2-7.5 (m, 5H);  $^{13}\text{C}$  NMR ( $\text{CDCl}_3$ , 75 MHz):  $\delta$  17.1 ( $\text{CH}_2$ ), 30.4 ( $\text{CH}_2$ ), 32.9 ( $\text{CH}_2$ ), 47.5 (CH), 49.9 (CH), 51.7 (CH), 126.7 (CH), 127.8 (2 x CH), 128.4 (CH), 128.5 (2 x CH), 132.2 (CH), 140.4 (C), 215.9 (C); HRMS Calcd. for  $\text{C}_{15}\text{H}_{16}\text{O}$ : 212.1201; Found: 212.1200; Anal. Calcd for  $\text{C}_{15}\text{H}_{16}\text{O}$ : C, 84.87; H, 7.60; Found: C, 84.79; H, 7.55

**Compound (+)-7b:**

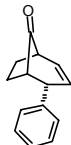

Yield: 88%.  $[\alpha]_{\text{D}}^{20} = +40.57$  ( $c$  0.53  $\text{CH}_2\text{Cl}_2$ ). Spectroscopic data, see: (±)-7b.

The enantiomeric ratio was determined by HPLC (Chiracel OJ column, 250 x 4.6 mm, 0.8 mL/min, hexane / ethanol 500:1): Retention times, 27.9 (4.5%) and 29.7 (95.5%) min.

**Compound (-)-endo-8b:**

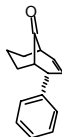

Solvent: THF; Temperature: -30 °C; Reaction time: 7d;  $[\alpha]_{\text{D}}^{20} = -10.31$  ( $c$  0.15  $\text{CH}_2\text{Cl}_2$ ). Spectroscopic data, see: (±)-endo-8b.

The enantiomeric ratio was determined by HPLC (Chiracel OJ column, 250 x 4.6 mm, 0.8 mL/min, hexane / isopropanol 250:1): Retention times, 23.2 (3%) and 38.9 (97%) min.

### Compound 12b

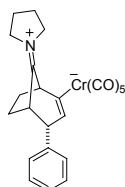

Yield: 64%; yellow solid; Mp; 200-202 dec.;  $^1\text{H}$  NMR ( $\text{CD}_2\text{Cl}_2$ , 300 MHz):  $\delta$  1.5-1.7 (m, 2H), 1.8-1.9 (m, 1H), 2.0-2.4 (m, 5H), 2.8 (m, 1H), 3.6 (m, 1H), 3.7-4.1 (m, 4H), 4.8 (m, 1H), 5.5 (m, 1H), 7.2-7.5 (m, 5H);  $^{13}\text{C}$  NMR ( $\text{CD}_2\text{Cl}_2$ , 75 MHz):  $\delta$  22.6 ( $\text{CH}_2$ ), 25.5 ( $\text{CH}_2$ ), 25.6 ( $\text{CH}_2$ ), 30.7 ( $\text{CH}_2$ ), 49.3 (CH), 53.0 ( $\text{CH}_2$ ), 54.1 ( $\text{CH}_2$ ), 60.5 (CH), 67.0 (CH), 128.0 (CH), 129.2 (2 x CH), 129.3 (2 x CH), 132.6 (CH), 141.9 (C), 183.3 (C), 199.3 (C), 223.8 (4 x C) 231.0 (C); EI-MS ( $m/z$ ): 252 [ $\text{M}-\text{Cr}(\text{CO})_5+1$ ]; Anal. Calcd. for  $\text{C}_{23}\text{H}_{21}\text{NO}_5\text{Cr}$ : C, 62.30; H, 4.77; N, 3.16. Found: C, 62.38; H, 4.72; N, 3.11.

### Compound 12c

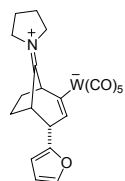

Yield: 67%; yellow solid; Mp; 155-158 dec.;  $^1\text{H}$  NMR ( $\text{CD}_2\text{Cl}_2$ , 300 MHz):  $\delta$  1.7-2.4 (m, 8H), 3.2 (brs, 1H), 3.8 (m, 1H), 3.8-4.1 (m, 4H), 4.7 (m, 1H), 5.7 (m, 1H), 6.4 (m, 2H), 7.4 (m, 1H);  $^{13}\text{C}$  NMR ( $\text{CD}_2\text{Cl}_2$ , 75 MHz):  $\delta$  22.7 ( $\text{CH}_2$ ), 25.0 ( $\text{CH}_2$ ), 25.1 ( $\text{CH}_2$ ), 30.2 ( $\text{CH}_2$ ), 46.0 (CH), 52.7 ( $\text{CH}_2$ ), 54.0 ( $\text{CH}_2$ ), 61.1 (CH), 62.2 (CH), 109.0 (CH), 110.7 (CH), 130.2 (CH), 142.0 (CH), 154.2 (C), 170.3 (C), 199.7 (C), 203.2 (4 x C) 207.0 (C); FAB-HRMS Calcd. for  $\text{C}_{21}\text{H}_{20}\text{NO}_6^{184}\text{W}$ : 566.0800; Found: 566.0793; Anal. Calcd. for  $\text{C}_{21}\text{H}_{19}\text{NO}_6\text{W}$ : C, 44.62; H, 3.39; N, 2.48. Found: C, 44.73; H, 3.29; N, 2.41.

### Compound 7-d-b

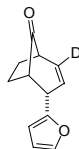

Yield: 93%; colourless oil;  $^1\text{H}$  NMR ( $\text{CDCl}_3$ , 300 MHz):  $\delta$  1.7-1.9 (m, 2H), 1.9-2.0 (m, 2H), 2.55 (m, 1H), 2.65 (m, 1H), 4.4 (m, 1H), 5.7 (s, 1H), 6.15 (m, 1H), 6.35 (m, 1H), 7.4 (m, 1H);  $^{13}\text{C}$  NMR ( $\text{CDCl}_3$ , 75 MHz):  $\delta$  19.8 ( $\text{CH}_2$ ), 28.6 ( $\text{CH}_2$ ), 44.6 (CH), 46.9 (CH), 49.5 (CH), 107.0 (CH), 110.0 (CH), 125.1 (CH), 133.7 (CD, t,  $J = 28$  Hz), 141.8 (CH), 153.8 (C), 215.1 (C); HRMS Calcd. for  $\text{C}_{12}\text{H}_{11}\text{DO}_2$ : 189.0900; Found: 189.0899, Anal. Calcd. for  $\text{C}_{12}\text{H}_{11}\text{DO}_2$ : C, 76.17; H, 6.92; Found: C, 76.28; H, 6.81.

### Compound 13b

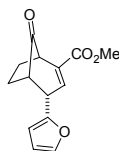

Yield: 64% Method A (from complex **12a**), 57% Method B (from alkenyl Fyscher carbene complex **1,2a**) ; colourless oil;  $^1\text{H}$  NMR ( $\text{CDCl}_3$ , 300 MHz):  $\delta$  1.8-1.9 (m, 1H), 2.0-2.2 (m, 3H), 2.8 (m, 1H), 3.0 (m, 1H), 3.7 (s, 3H), 4.0 (m, 1H), 6.2 (m, 1H), 6.3 (m, 1H), 6.4 (m, 1H), 7.4 (m, 1H);  $^{13}\text{C}$  NMR ( $\text{CDCl}_3$ , 75 MHz):  $\delta$  21.6 ( $\text{CH}_2$ ), 28.2 ( $\text{CH}_2$ ), 44.2 (CH), 45.4 (CH), 52.3 ( $\text{CH}_3$ ), 53.4 (CH), 106.5 (CH), 111.2 (CH), 115.2 (CH), 134.2 (C), 142.8 (CH), 151.4 (C), 171.2 (C), 213.2 (C); HRMS Calcd. for  $\text{C}_{14}\text{H}_{14}\text{O}_4$ : 246.0892; Found: 246.0881, Anal. Calcd. for  $\text{C}_{14}\text{H}_{14}\text{O}_4$ : C, 68.28; H, 5.73; Found: C, 68.22; H, 5.67.

### Compound ( $\pm$ )-15b

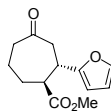

Yield: 64%; colourless oil;  $^1\text{H}$  NMR ( $\text{CDCl}_3$ , 300 MHz):  $\delta$  1.8-2.2 (m, 4H), 2.5 (m, 2H), 2.8 (dd, 1H,  $J = 2.56, 14.10$  Hz), 3.0 (m, 2H), 3.4 (dt, 1H,  $J = 2.57, 10.52$  Hz), 3.6 (s, 3H), 6.0 (m, 1H), 6.3 (m, 1H), 7.3 (m, 1H);  $^{13}\text{C}$  NMR ( $\text{CDCl}_3$ , 75 MHz):  $\delta$  21.3 ( $\text{CH}_2$ ), 30.6 ( $\text{CH}_2$ ), 37.2 (CH), 43.3 ( $\text{CH}_2$ ), 46.0 ( $\text{CH}_2$ ), 51.0 (CH), 51.8 ( $\text{CH}_3$ ), 105.4 (CH), 110.0 (CH), 141.5 (CH), 155.4 (C), 174.4 (C), 211.7 (C); FAB-HRMS (M+1) Calcd. for  $\text{C}_{13}\text{H}_{17}\text{O}_4$ : 237.1128; Found: 237.1127, Anal. Calcd. for  $\text{C}_{16}\text{H}_{16}\text{O}_3$ : C, 66.09; H, 6.83; Found: C, 66.15; H, 6.74.

### Compound ( $\pm$ )-15c

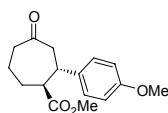

Yield: 61%; white solid; Mp: 108-109° C;  $^1\text{H}$  NMR ( $\text{CDCl}_3$ , 300 MHz):  $\delta$  1.7 (m, 1H), 1.9 (m, 1H), 2.1 (m, 1H), 2.2 (m, 1H), 2.6 (m, 3H), 2.8 (dt, 1H,  $J = 2.85, 10.82$  Hz), 3.1 (m, 2H), 3.4 (s, 3H), 3.8 (s, 3H), 6.8 (d, 2H,  $J = 8.8$  Hz), 7.1 (d, 2H,  $J = 8.8$  Hz);  $^{13}\text{C}$  NMR ( $\text{CDCl}_3$ , 75 MHz):  $\delta$  22.0 ( $\text{CH}_2$ ), 31.9 ( $\text{CH}_2$ ), 43.2 ( $\text{CH}_2$ ), 43.6 (CH), 49.8 ( $\text{CH}_2$ ), 51.4 ( $\text{CH}_3$ ), 55.1 (CH +  $\text{CH}_3$ ), 113.8 (2 x CH), 127.9 (2 x CH), 135.5 (C), 158.2 (C), 174.6 (C), 212.2 (C); HRMS Calcd. for  $\text{C}_{16}\text{H}_{20}\text{O}_4$ : 276.1362; Found: 276.1362, Anal. Calcd. for  $\text{C}_{16}\text{H}_{20}\text{O}_4$ : C, 69.54; H, 7.30; Found: C, 69.58; H, 7.28.

### Compound (+)-15b

Yield: 54%.  $[\alpha]_{\text{D}}^{20} = +11.0$  ( $c$  0.1  $\text{CH}_2\text{Cl}_2$ ). Spectroscopy data, see: ( $\pm$ )-15b.

The enantiomeric ratio was determined by HPLC (chiracel OB-H column, 250 x 4.6 mm, 0.8 mL/min, hexane / ethanol 50:1): Retention times, 31.7 (4.5%) and 36.7 (95.5%) min.

### Compound (+)-15c

Yield: 55%.  $[\alpha]_{\text{D}}^{20} = +55.7$  ( $c$  0.67  $\text{CH}_2\text{Cl}_2$ ). Spectroscopy data, see: ( $\pm$ )-15c.



The enantiomeric ratio was determined by HPLC (chiracel OB-H column, 250 x 4.6 mm, 0.8 mL/min, hexane / ethanol / isopropanol 50:1:1): Retention times, 39.1 (98%) and 42.6 (2%) min.

*Synthesis of ketone (+)-22.*

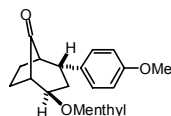

In a sealed tube, the residue crude from **5g** was dissolved in 30 mL of a mixture of 20 mL of water and 10 mL of methanol and stirred at 170°C for 3 hours. After cooling down, the mixture was extracted with ethyl acetate (3 x 20 mL). The organic layer was washed with water and dried over Na<sub>2</sub>SO<sub>4</sub>. Evaporation of the solvents and chromatographic purification of the residue on silica gel (hexane: ethyl acetate (3:1)) yielded the ketone **(+)-22** (70%).

Colorless oil;  $[\alpha]_D^{20} = +13.9$  (*c* 0.23 CH<sub>2</sub>Cl<sub>2</sub>); <sup>1</sup>H NMR (CDCl<sub>3</sub>, 300 MHz): δ 0.7 (d, 3H, *J* = 7.0 Hz), 0.9 (d, 3H, *J* = 7.0 Hz), 0.95 (d, 3H, *J* = 7.0 Hz), 0.8-1.0 (m, 3H), 1.3 (m, 2H), 1.5-2.3 (m, 10H), 2.4 (m, 2H), 3.1 (dt, 1H, *J* = 4.4, 10.4 Hz), 3.5 (dd, 1H, *J* = 3.9, 11.8 Hz), 3.8 (s, 3H), 4.1 (s, 1H), 6.9 (d, 2H, *J* = 8.4 Hz), 7.2 (d, 2H, *J* = 8.4 Hz); <sup>13</sup>C NMR (CDCl<sub>3</sub>, 75 MHz): δ 15.8 (CH<sub>3</sub>), 17.3 (CH<sub>2</sub>), 20.5 (CH<sub>2</sub>), 21.2 (CH<sub>3</sub>), 22.3 (CH<sub>3</sub>), 22.9 (CH<sub>2</sub>), 25.1 (CH), 27.4 (CH<sub>2</sub>), 31.5 (CH), 34.4 (CH<sub>2</sub>), 40.6 (CH<sub>2</sub>), 44.2 (CH), 48.2 (CH), 49.3 (CH), 50.9 (CH), 55.2 (CH<sub>3</sub>), 77.1 (CH), 79.5 (CH), 113.8 (2 x CH), 128.1 (2 x CH), 134.1 (C), 158.2 (C), 216.3 (C); HRMS Calcd for C<sub>25</sub>H<sub>36</sub>O<sub>3</sub>: 384.2664; Found: 384.2663; Anal. Calcd for C<sub>25</sub>H<sub>36</sub>O<sub>3</sub>: C, 78.08; H, 9.44; Found: C, 78.25; H, 9.52

*Synthesis of hydrazone (-)-23.*

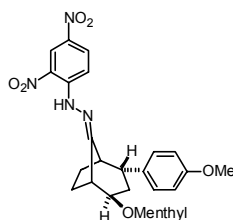

5 mL of concentrated sulfuric acid was added over a stirred suspension of 240 mg (1.2 mmol) of 2,4-dinitrophenylhydrazine in 5 mL of methanol. After almost completely dissolution of the hydrazine the mixture was filtered. To the obtained solution, 192 mg (0.5 mmol) of the ketone (-)-**22** was added. After 10 minutes of reaction, the obtained suspension was cooled down to 0°C and the solid separated and washed with cold methanol (3 x 5 mL). The solid was redissolved in hot methanol and filtered again. Slow cooling of the solution precipitates the hydrazone (-)-**23** as a pure compound, which was filtered and dried under vacuum.

Yield: 90%; yellow solid; Mp: 146-148 °C;  $[\alpha]_D^{20} = -683.6$  (*c* 0.15 in CH<sub>2</sub>Cl<sub>2</sub>); <sup>1</sup>H NMR (CDCl<sub>3</sub>, 300 MHz): δ 0.5-2.3 (m, 24H), 2.9 (m, 1H), 3.1-3.5 (m, 3H), 3.8 (s, 3H), 4.2 (m, 1H), 6.9 (d, 2H, *J* = 8.6 Hz), 7.2 (d, 2H, *J* = 8.6 Hz), 7.9 (d, 1H, *J* = 9.7 Hz), 8.3 (d, 1H, *J* = 9.7 Hz), 9.1 (s, 1H), 11.3 (s, 1H); <sup>13</sup>C NMR (CDCl<sub>3</sub>, 75 MHz): δ 15.7 (CH<sub>3</sub>), 19.2 (CH<sub>2</sub>), 20.9 (CH<sub>3</sub>), 22.2 (CH<sub>3</sub>), 22.9 (CH<sub>2</sub>), 23.7 (CH<sub>2</sub>), 25.1 (CH<sub>2</sub>), 26.0 (CH<sub>2</sub>), 31.3 (CH), 34.1 (CH<sub>2</sub>), 39.0 (CH), 41.8 (CH), 46.4 (CH), 48.0 (CH), 48.2 (CH), 55.2 (CH<sub>3</sub>), 74.6 (CH), 76.5 (CH), 113.8 (2 x CH), 116.0 (CH), 123.7 (CH), 128.2 (2 x CH), 128.5 (C), 129.6 (CH), 134.1 (C), 137.0 (C), 145.5 (C), 158.3 (C), 173.1 (C); Electro-spray-MS (*m/z*): 565 (M<sup>+</sup> + 1); Anal. for C<sub>31</sub>H<sub>40</sub>N<sub>4</sub>O<sub>6</sub> Calcd.: C, 65.94; H, 7.14; N, 9.92; Found: C, 65.91; H, 6.98; N, 9.85

#### Synthesis of hydrazone (+)-**24**.

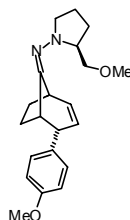

21 mg (0.16 mmol) of (*S*)-(-)-1-amino-2-methoxymethylpyrrolidine in 220 µL of toluene was added to a solution of 51 mg (0.15 mmol) of the ketone (+)-**7c** in 1 mL of toluene. The mixture was stirred at 60°C for 16 hours. After cooling down, 12 mL of water was added and the two-phase mixture was extracted with diethyl ether (3 x 15 mL). The organic layer was washed with water and dried over Na<sub>2</sub>SO<sub>4</sub>. The solvents were evaporated and the residue purified by chromatography on silica gel (5 % of ethyl acetate in hexane). The residue was dissolved in pentane and cooled down to -20°C to obtain a whited solid enriched in the mayor

estereoisomer of the hidrazone (-)-**24**. After two successive cristalizaciones this isomer could be obtained as a sole compound.

White solid; Mp: 79-81°C;  $[\alpha]_D^{20} = +472.53$  (*c* 0.43 CH<sub>2</sub>Cl<sub>2</sub>); <sup>1</sup>H NMR (CDCl<sub>3</sub>, 300 MHz): δ 1.5-1.9 (m, 7H), 2.0 (m, 1H), 2.6 (q, 1H, *J* = 8.7 Hz), 2.7 (m, 1H), 3.3 (m, 4H), 3.4 (s, 3H), 3.5 (m, 1H), 3.8 (s, 3H), 4.1 (m, 1H), 5.6 (ddd, 1H, *J* = 1.3, 2.4, 9.6 Hz), 6.1 (ddd, 1H, *J* = 2.4, 7.0, 9.6 Hz), 6.9 (d, 2H, *J* = 8.6 Hz), 7.1 (d, 2H, *J* = 8.6 Hz); <sup>13</sup>C NMR (CDCl<sub>3</sub>, 75 MHz): δ 20.3 (CH<sub>2</sub>), 22.0 (CH<sub>2</sub>), 26.4 (CH<sub>2</sub>), 31.3 (CH<sub>2</sub>), 36.5 (CH), 46.8 (CH), 54.0 (CH), 55.2 (CH), 55.6 (CH<sub>2</sub>), 59.2 (CH<sub>3</sub>), 66.4 (CH<sub>3</sub>), 75.2 (CH<sub>2</sub>), 113.6 (2 x CH), 128.9 (CH), 129.1 (2 x CH), 133.3 (CH), 133.9 (C), 158.1 (C), 172.8 (C); HRMS Calcd for C<sub>21</sub>H<sub>28</sub>N<sub>2</sub>O<sub>2</sub>: 340.2151; Found: 340.2147. Anal. Calcd: C, 74.08; H, 8.28; N, 8.22; Found: C, 74.27; H, 8.51; N, 8.10
